# Supplementary material for: Genome-wide meta-analysis identifies 22 loci for normal tension glaucoma with significant overlap with high tension glaucoma
Source: PubMed Central journal article supplement — Nat Commun. 2024 Nov 17;15:9959. doi: 10.1038/s41467-024-54301-2 (PMC11570636; doi:10.1038/s41467-024-54301-2), 2024-11-17
Supplement: 41467_2024_54301_MOESM1_ESM.pdf [file 41467_2024_54301_MOESM1_ESM.pdf]

**Genome-wide meta-analysis identifies 22 loci for normal tension glaucoma  
with significant overlap with high tension glaucoma**

Diaz-Torres *et al.*

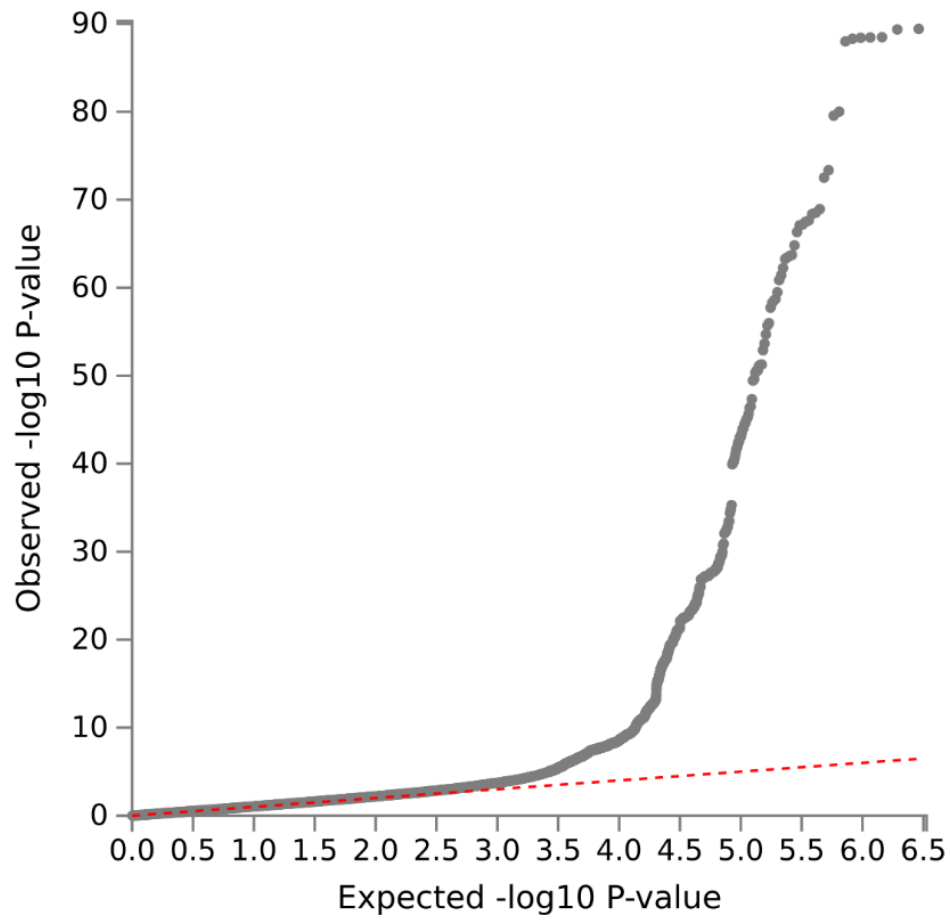

**Supplementary Figure 1.** QQ Plot based on the stage-two meta-analysis of normal tension glaucoma (NTG) with an estimated genetic inflation factor ( $\lambda$ ) of 1.08.

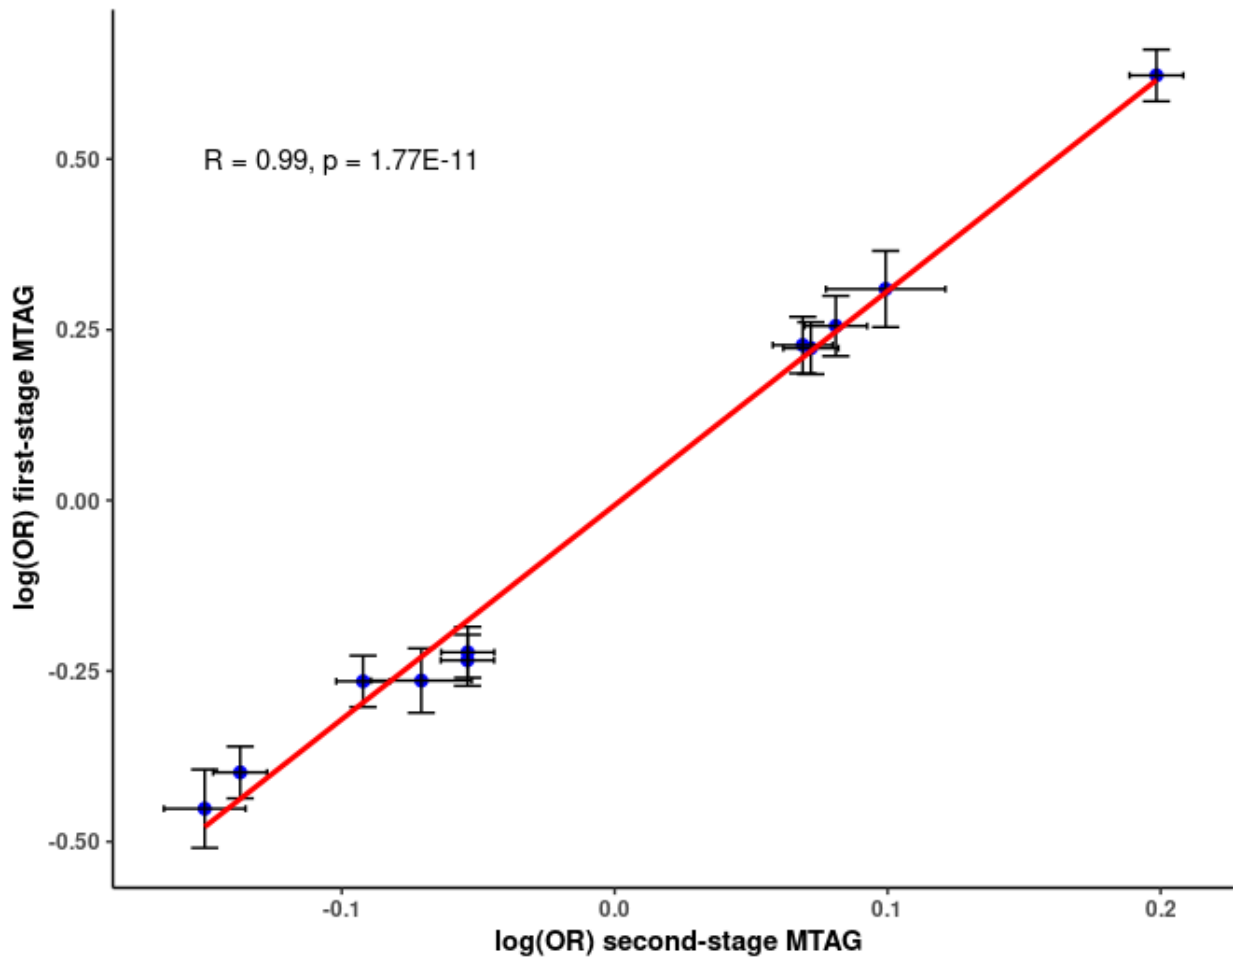

**Supplementary Figure 2.** Inverse weighted variance correlation between the effect sizes of the first and second stages of the meta-analysis (N=11). Estimated in log(OR) and based on the stage-one genome-wide independent loci. Effects estimates are presented as centre points and black crosses represent 95% confidence intervals.

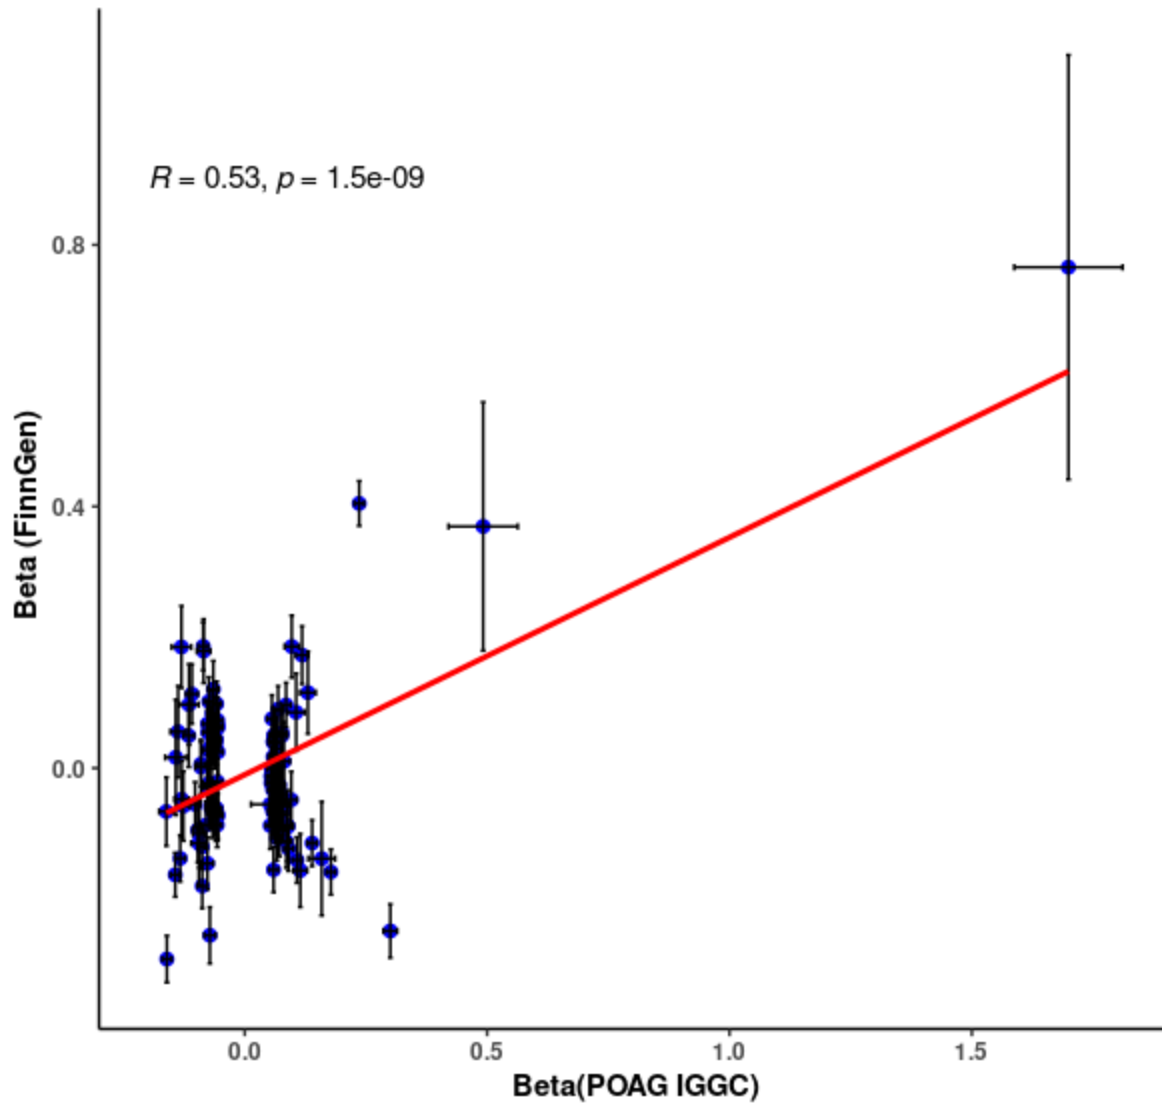

**Supplementary Figure 3.** Inverse weighted variance correlation of the allele effect estimates (N=127) between POAG risk loci and FinnGen NTG. Effects estimate (Beta) are presented as blue centre points and black crosses represent 95% confidence intervals

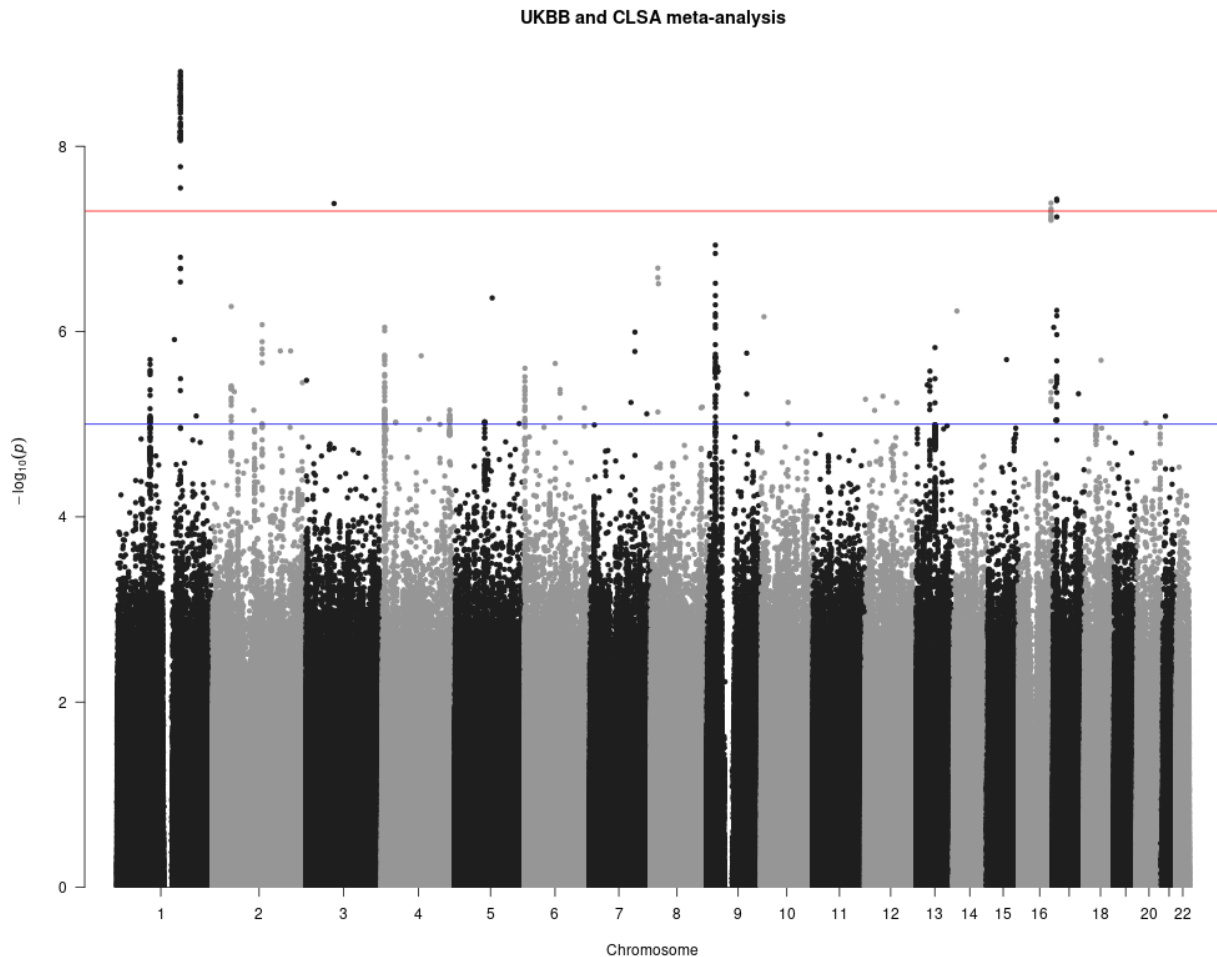

**Supplementary Figure 4.** Manhattan plot based on the GWAS meta-analysis of UKBB and CLSA (N Cases = 2,939, N Controls = 10,000). The red line represents the threshold for multiple testing correction ( $p < 5 \times 10^{-8}$ ) and the blue line  $p < 5 \times 10^{-6}$ ; p-values derived from logistic regression models are two-sided.

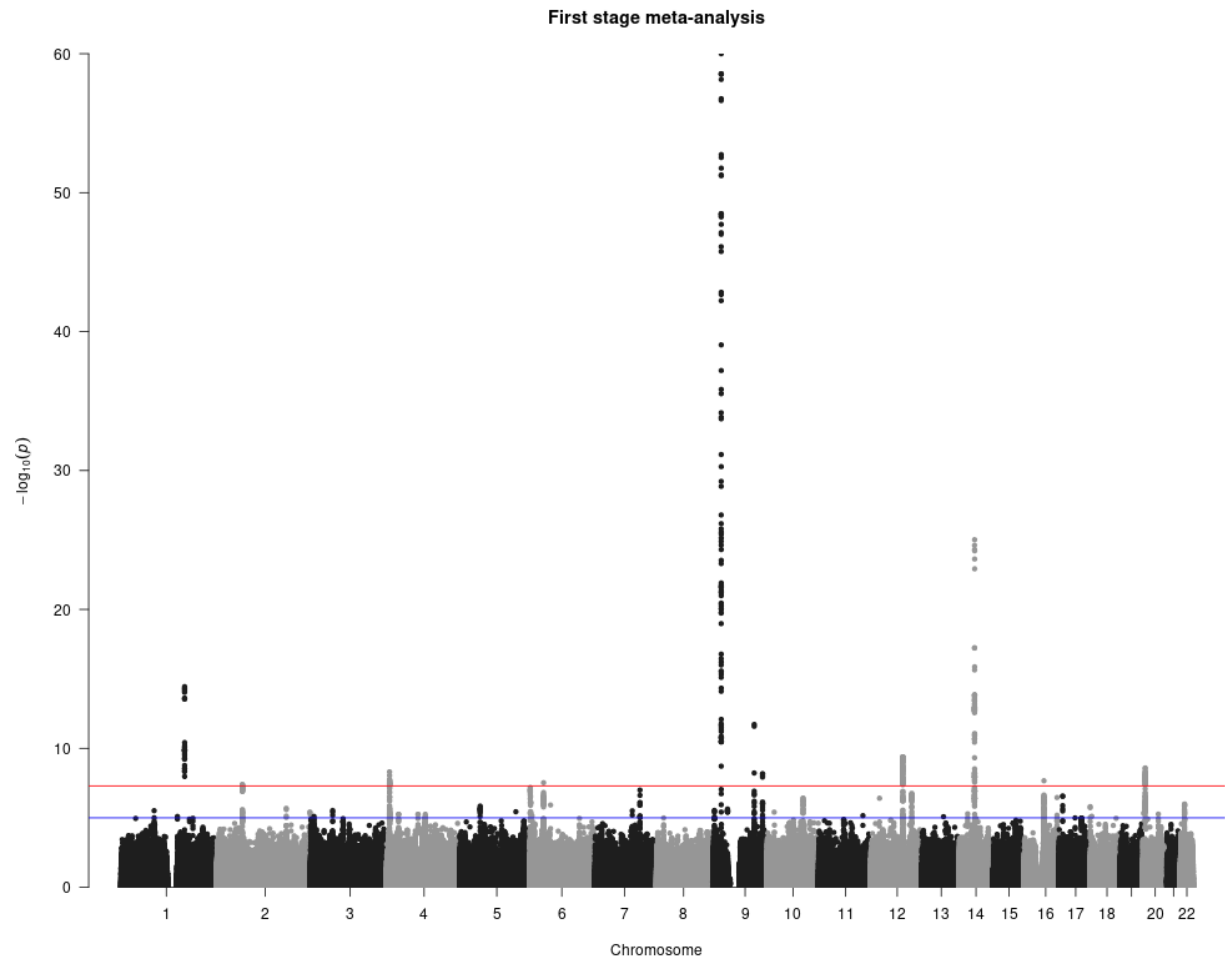

**Supplementary Figure 5.** Manhattan plot based on the first stage of the GWAS meta-analysis (N Cases = 6,186; N Controls = 57,997; N VCDR = 97,939 ). The red line represents the threshold for multiple testing correction ( $p < 5 \times 10^{-8}$ ) and the blue line  $p < 5 \times 10^{-6}$ ; p-values derived from logistic regression models are two-sided.

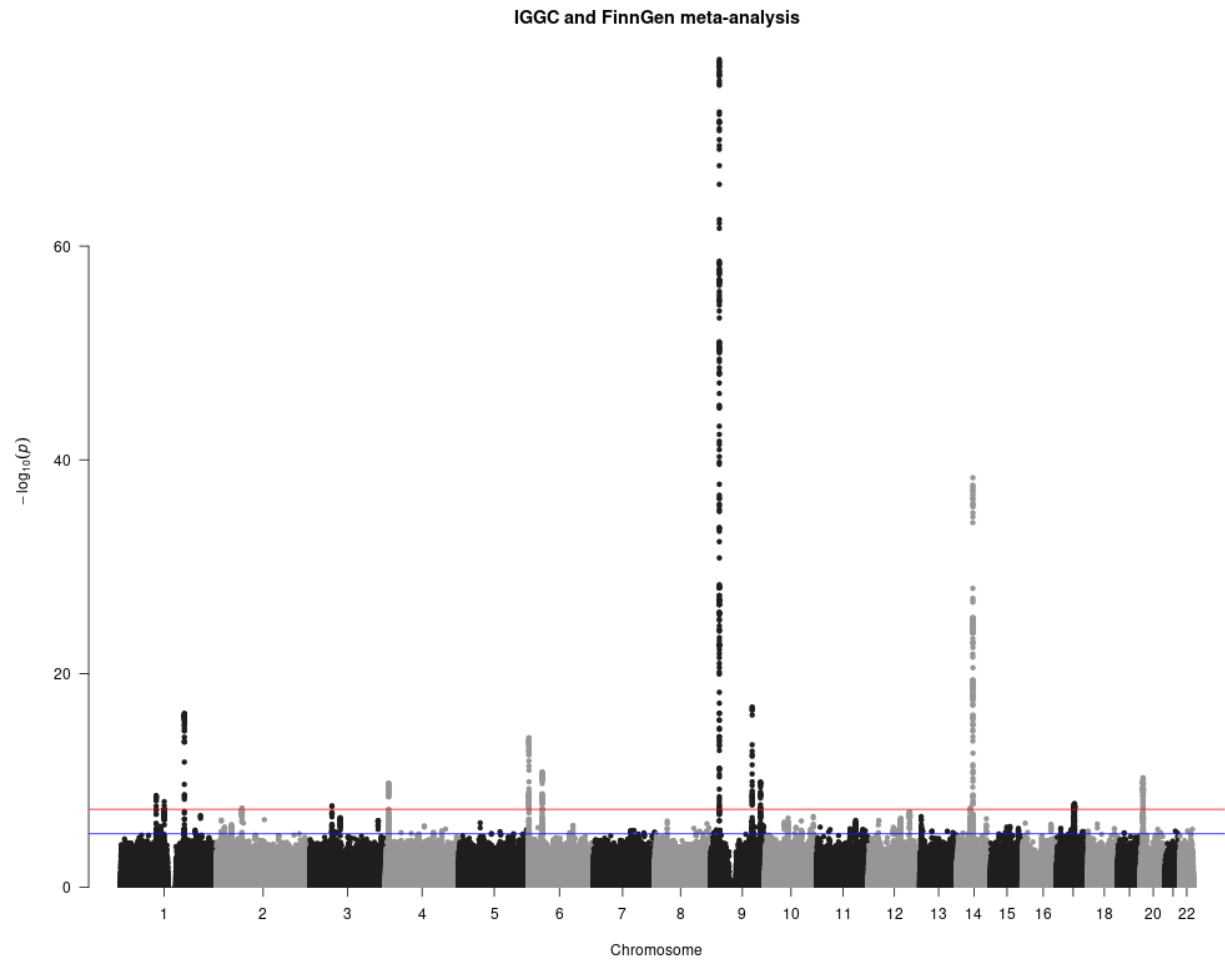

**Supplementary Figure 6.** Manhattan plot based on the GWAS meta-analysis of IGGC and FinnGen, as part of the second meta-analysis stage (N Cases = 7,942; N Controls = 384,431; N VCDR = 97,939 ). The red line represents the threshold for multiple testing correction ( $p < 5 \times 10^{-8}$ ) and the blue line  $p < 5 \times 10^{-6}$ ; p-values derived from logistic regression models are two-sided.

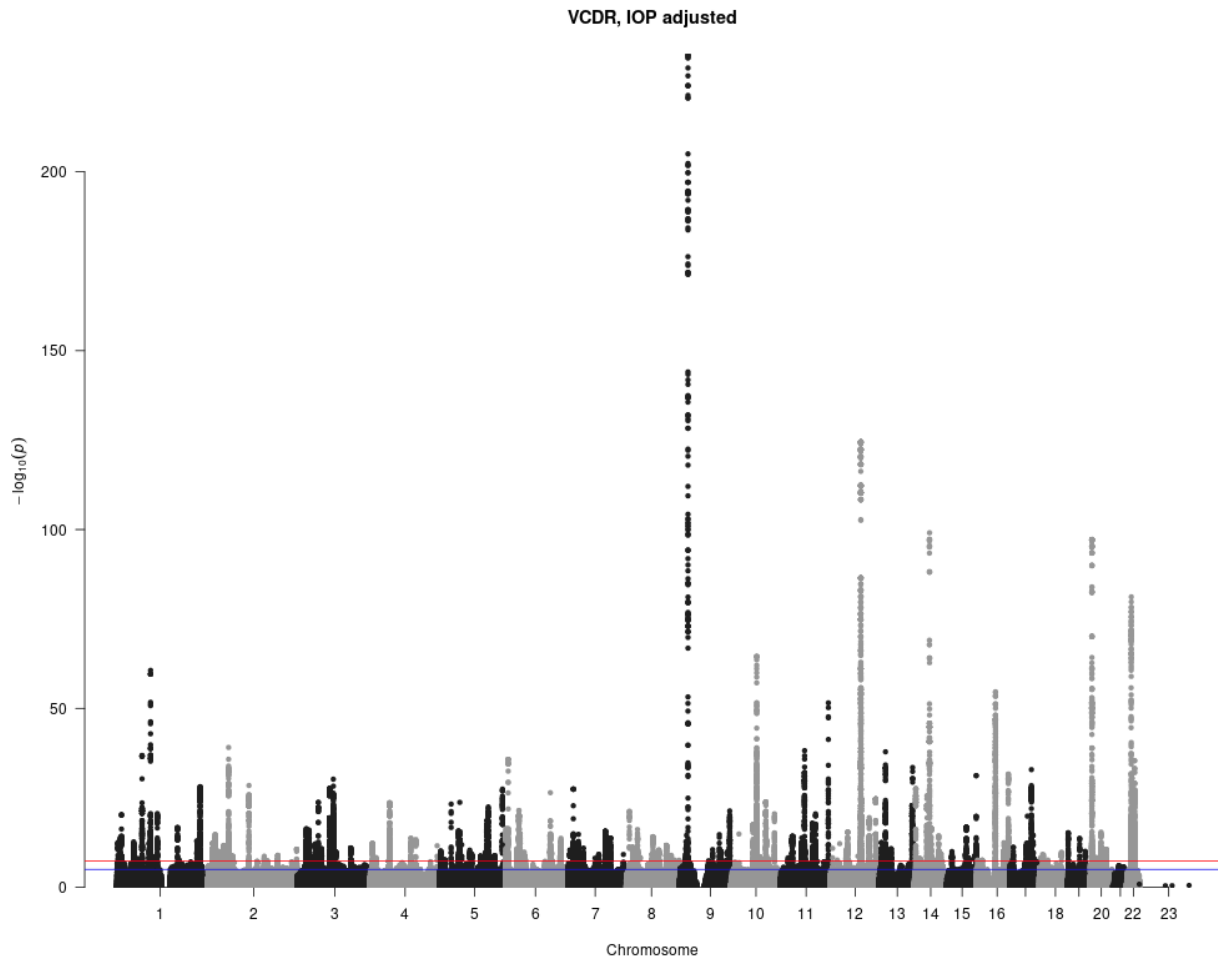

**Supplementary Figure 7.** Manhattan plot based on the association of VCDR loci adjusted by intra-ocular pressure using the mtCOJO method ( $N = 97,939$ ). The red line represents the threshold for multiple testing correction ( $p < 5 \times 10^{-8}$ ) and the blue line  $p < 5 \times 10^{-6}$ ; p-values derived from logistic regression models are two-sided.



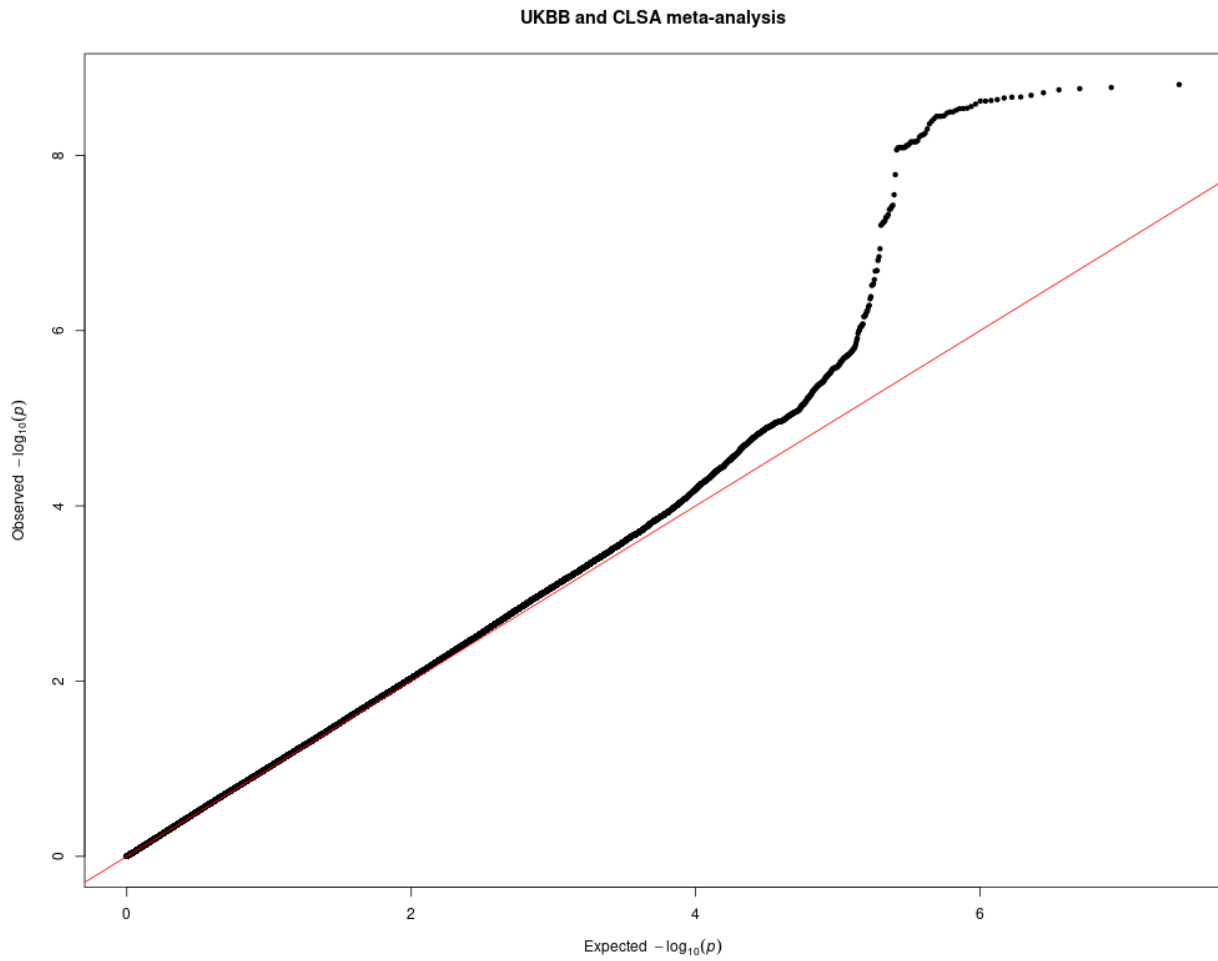

**Supplementary Figure 8.** QQ Plot based on the UKBB and CLSA meta-analysis of normal tension glaucoma (NTG) with an estimated genetic inflation factor ( $\lambda$ ) of 1.02.

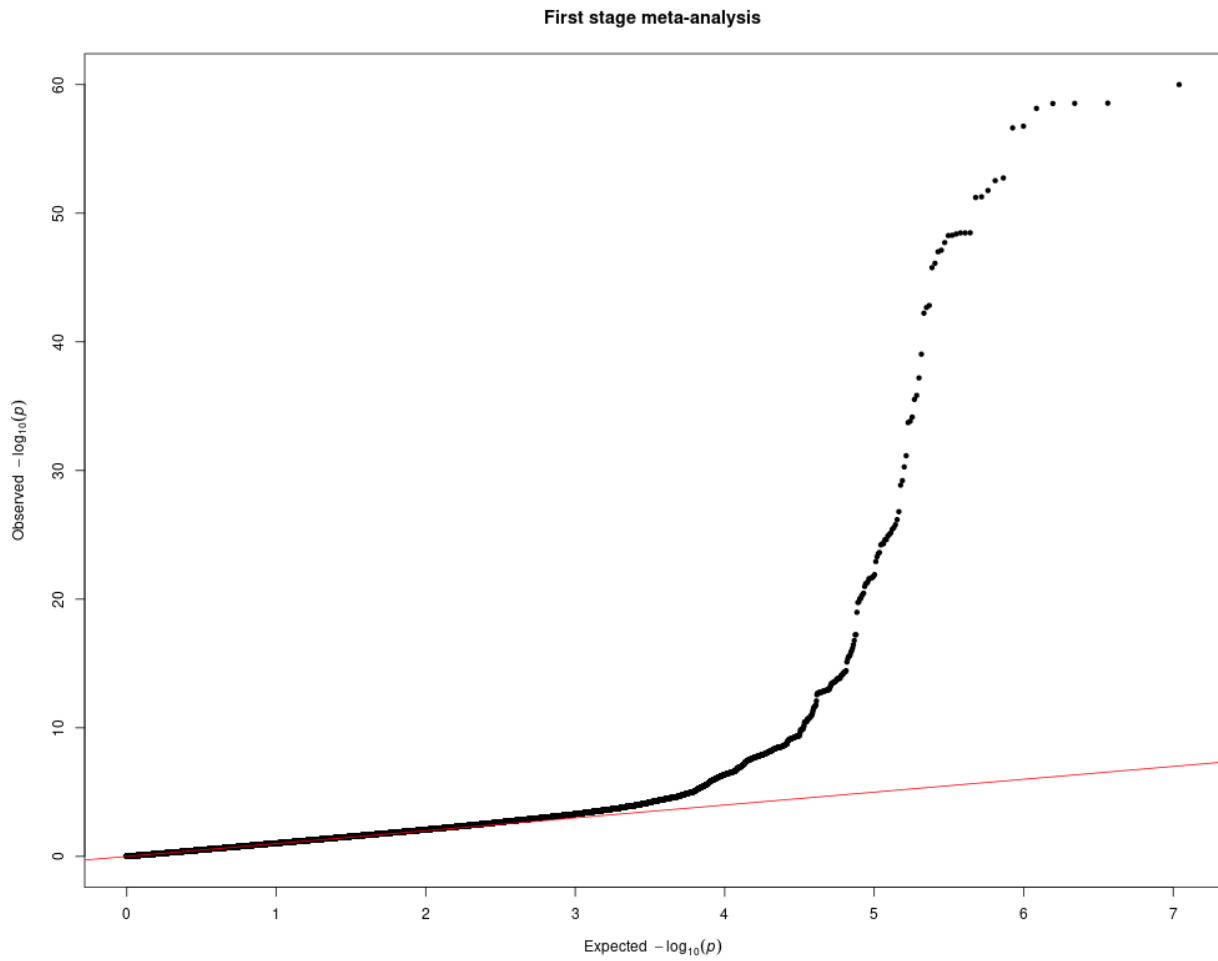

**Supplementary Figure 9.** QQ Plot based on the IGGC and FinnGen meta-analysis of normal tension glaucoma (NTG) with an estimated genetic inflation factor ( $\lambda$ ) of 1.02

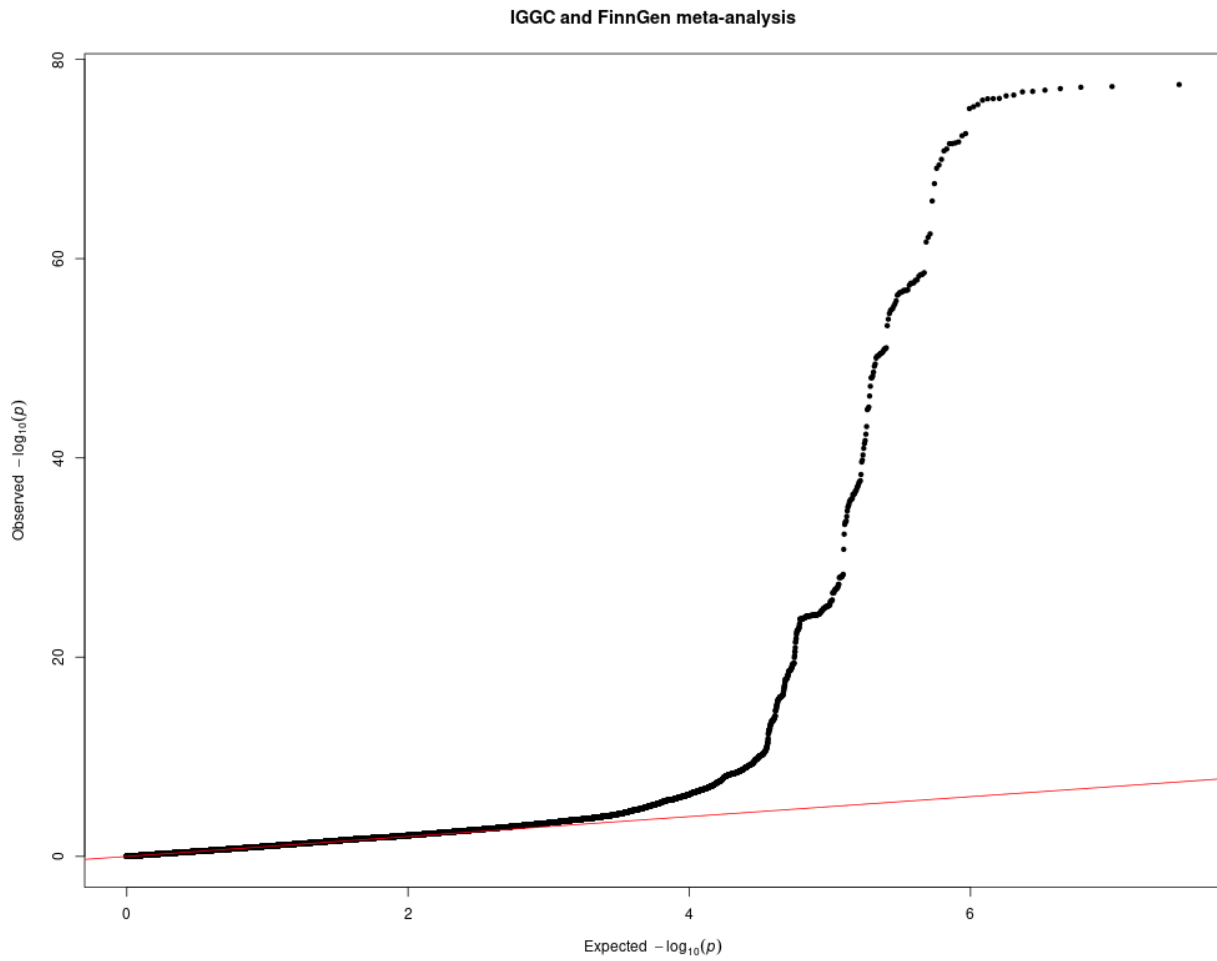

**Supplementary Figure 10.** QQ Plot based on the IGGC and FinnGen meta-analysis of normal tension glaucoma (NTG) with an estimated genetic inflation factor ( $\lambda$ ) of 0.97

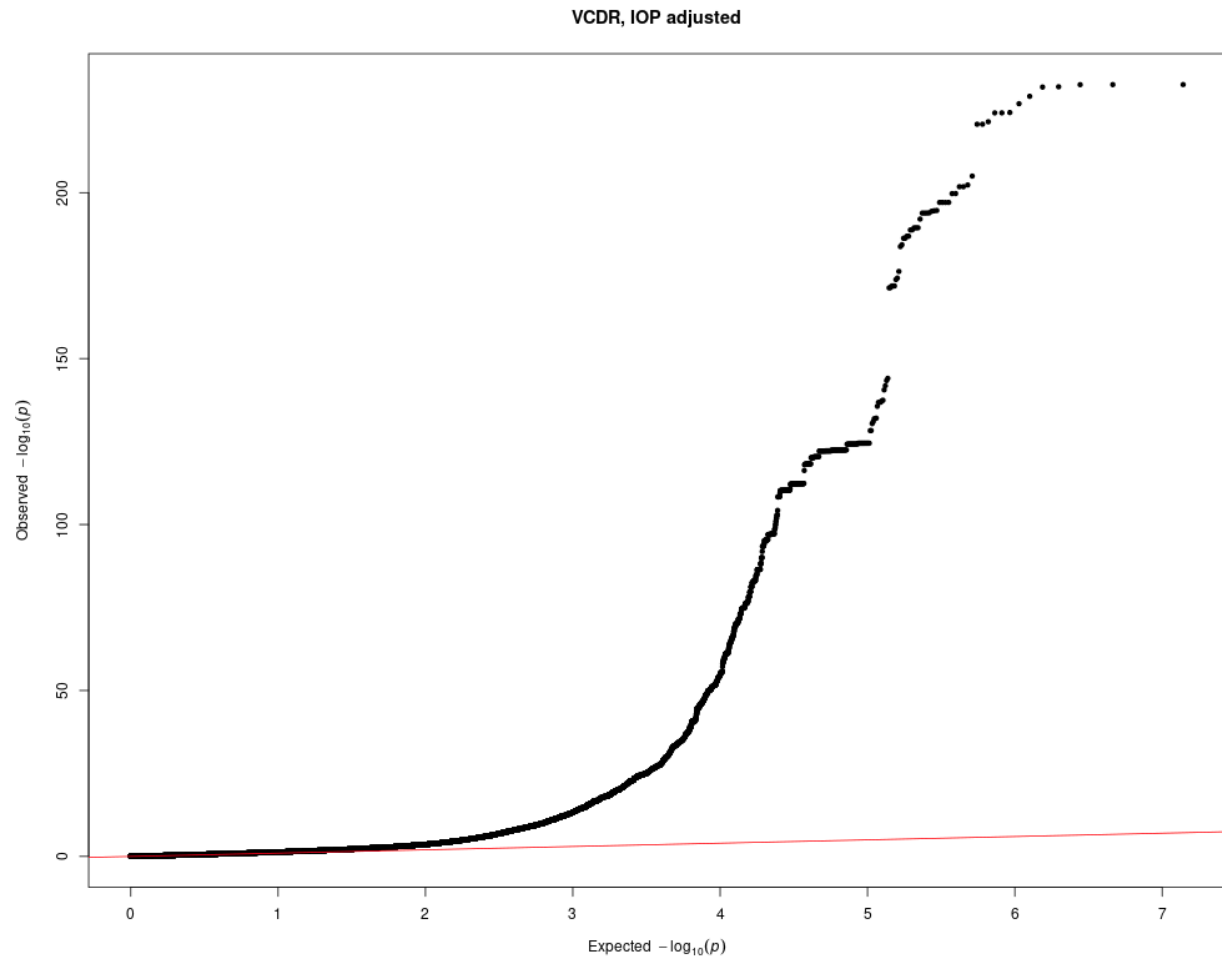

**Supplementary Figure 11.** QQ Plot based on the VCDR analysis adjusted for intra-ocular pressure with an estimated genetic inflation factor ( $\lambda$ ) of 1.01.

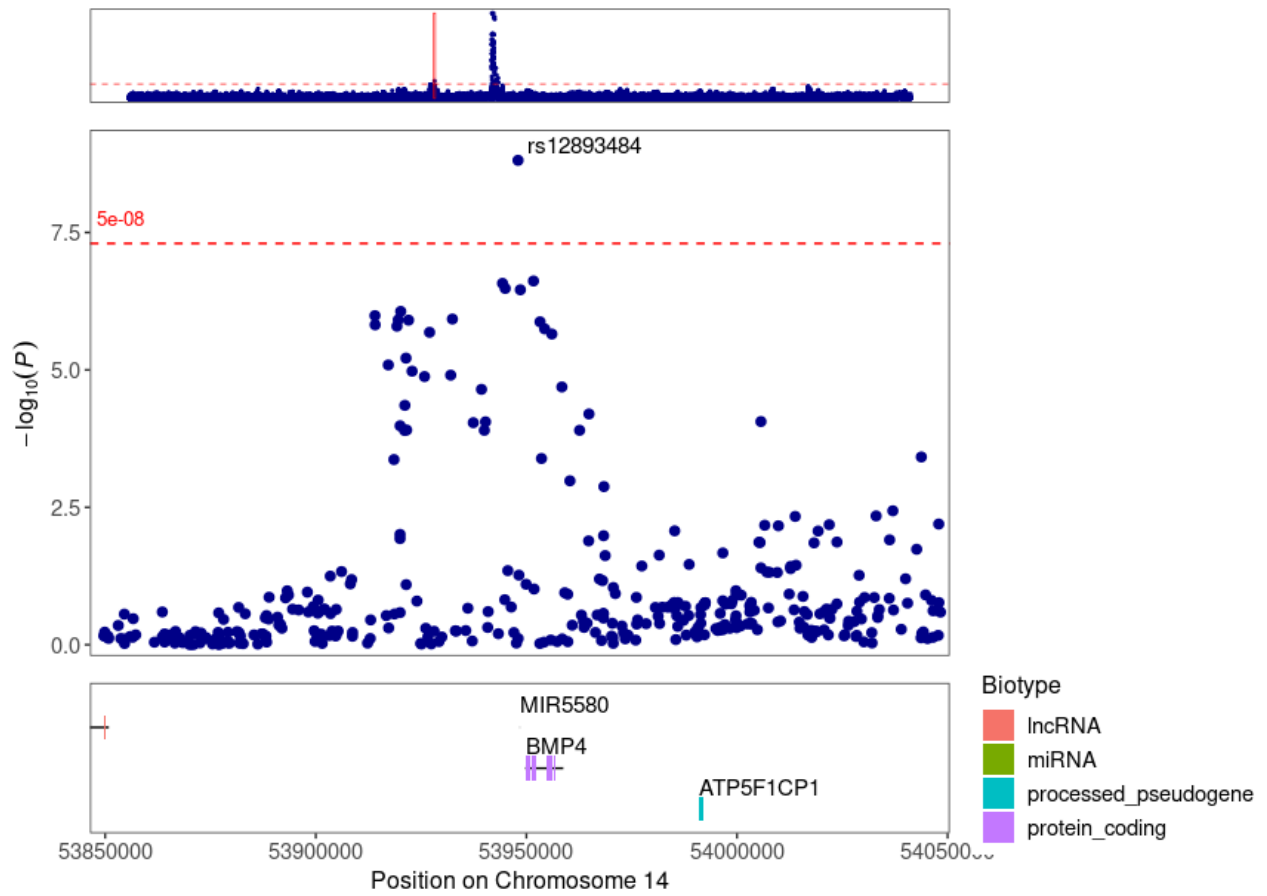

**Supplementary Figure 12.** Zoom plot of the *BMP4* region before conditional analysis of the rs12893484 locus using GCTA-COJO.

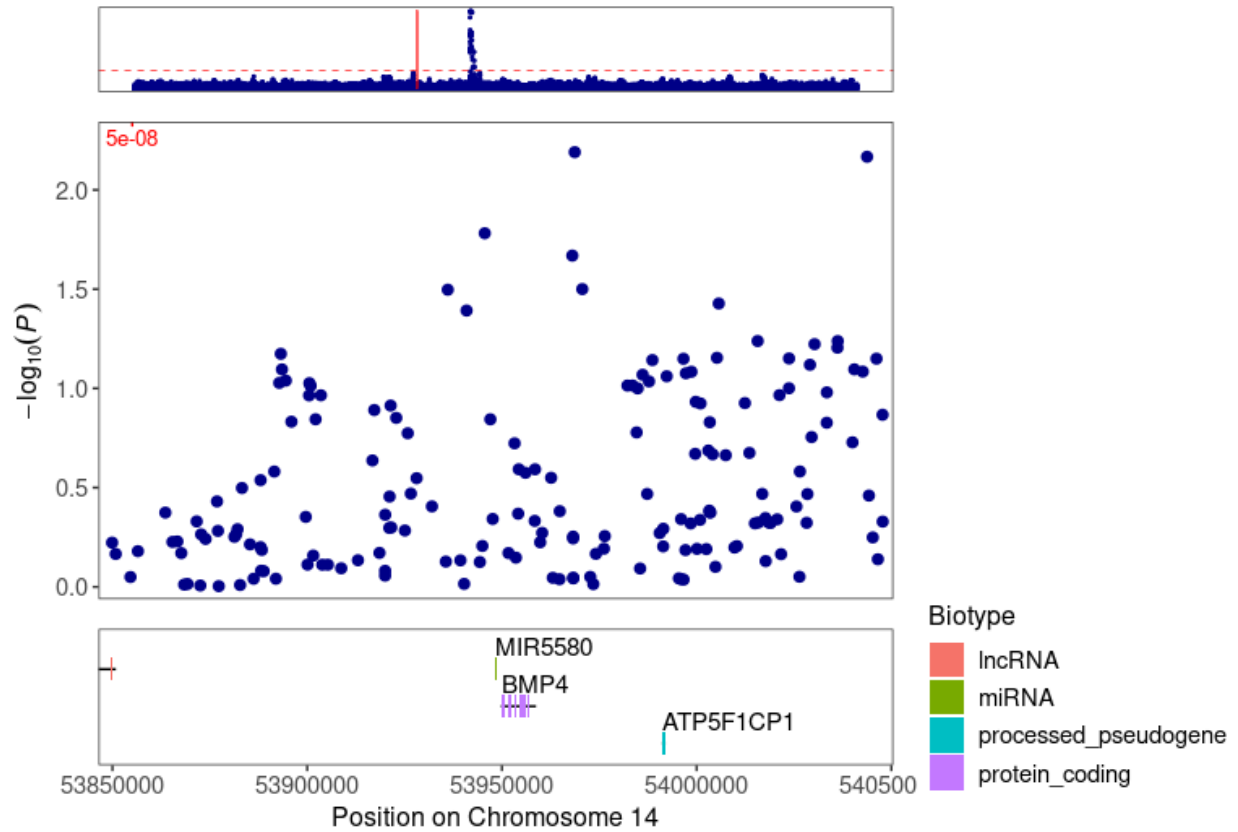

**Supplementary Figure 13.** Zoom plot of the BMP4 region after conditional analysis of the rs12893484 locus using GCTA-COJO.

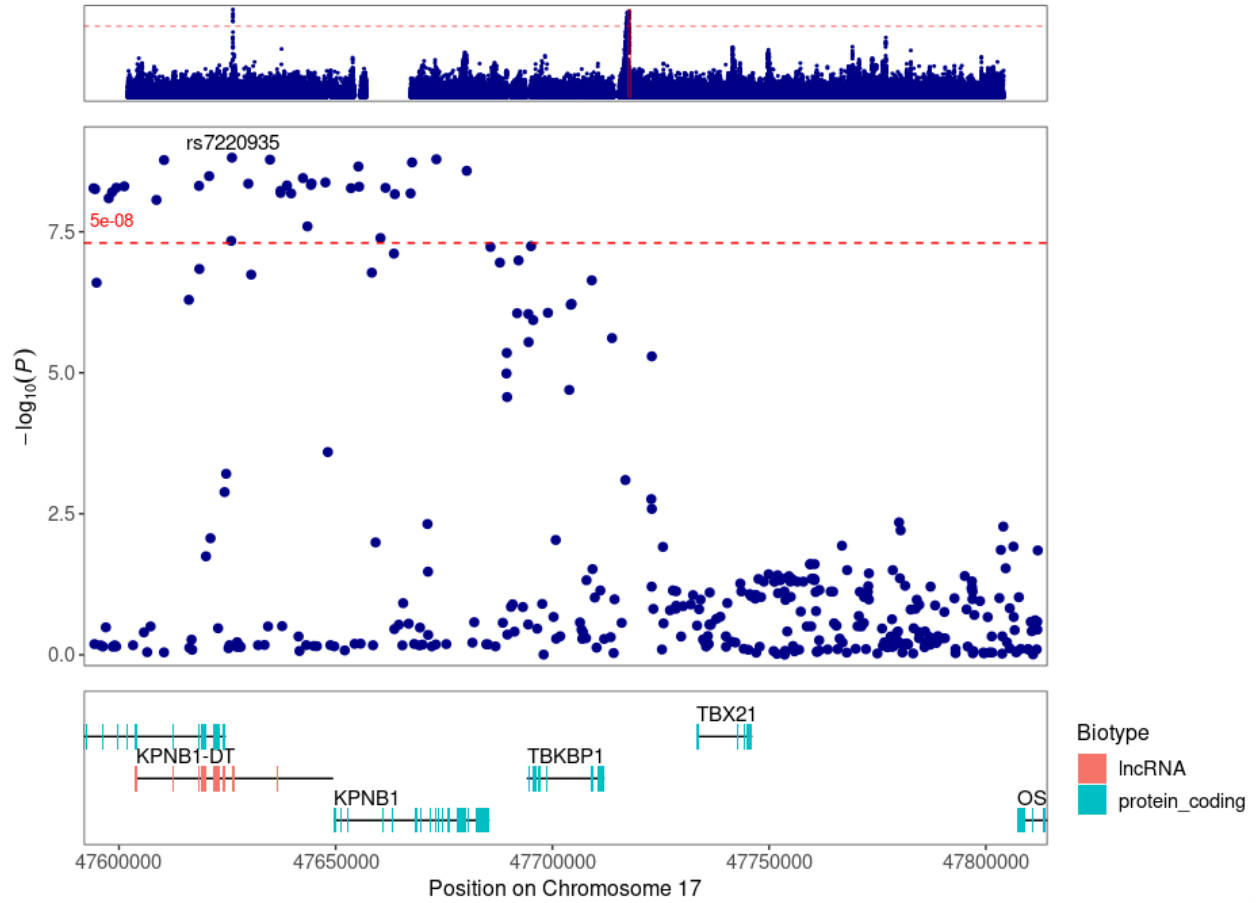

**Supplementary Figure 14.** Zoom plot of the *TBKBP1* region before conditional analysis of the rs7220935 locus using GCTA-COJO.

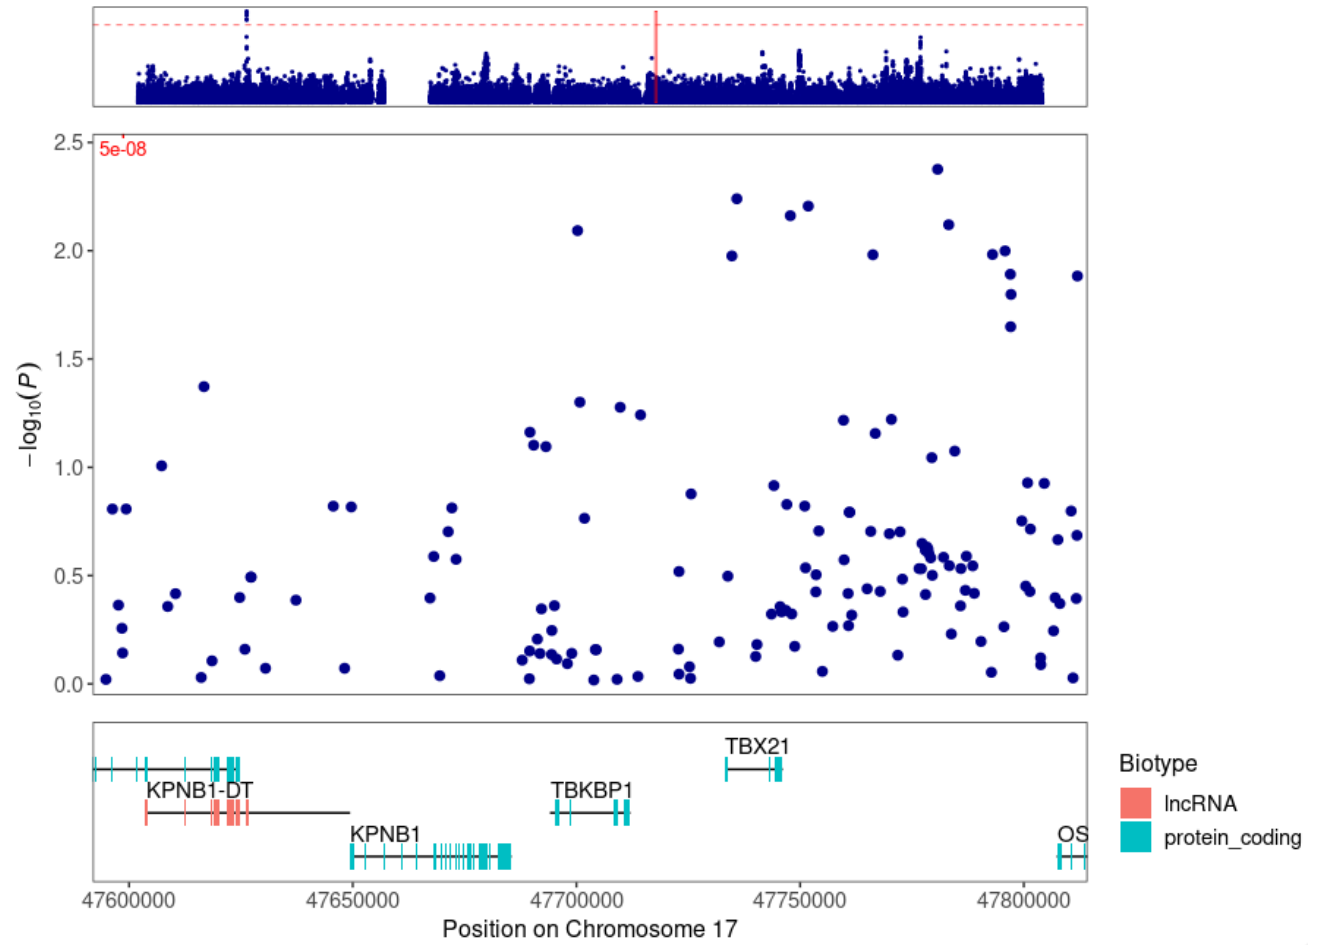

**Supplementary Figure 15.** Zoom plot of the *TBKBP1* region after conditional analysis of the rs7220935 locus using GCTA-COJO.



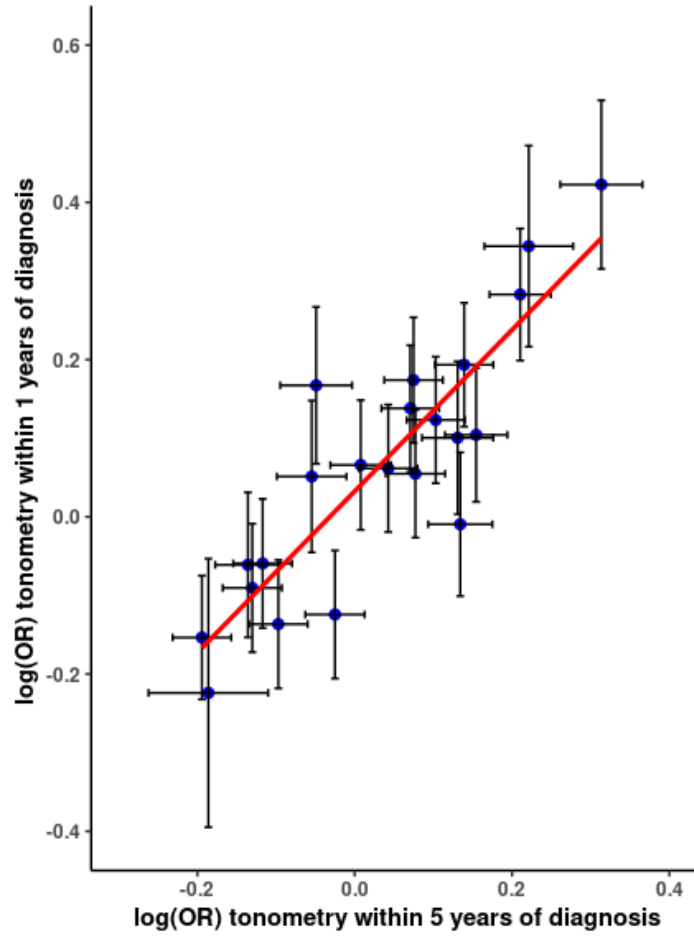

**Supplementary Figure 16.** Inverse weighted variance correlation of the effect size between the 22 identified loci in two MTAG outputs (N=22): one including participants who had tonometry performed within 1 year of diagnosis, and the other within 5 years of diagnosis.
